# Supplementary material
Source: PubMed Central journal article supplement (PMC5948142)

Supplemental Figure 1. In vitro release rates of the CVRs used in the study shows the expected relationship between estrogen load and release at steady state. The lower initial peak with the 40µg/day rings reflects a shorter interval of time between ring production and testing. The greater storage time of the 10µg/day and 20µg/day CVR before testing allowed more migration of drug to the surface of the rings resulting in a higher initial release.

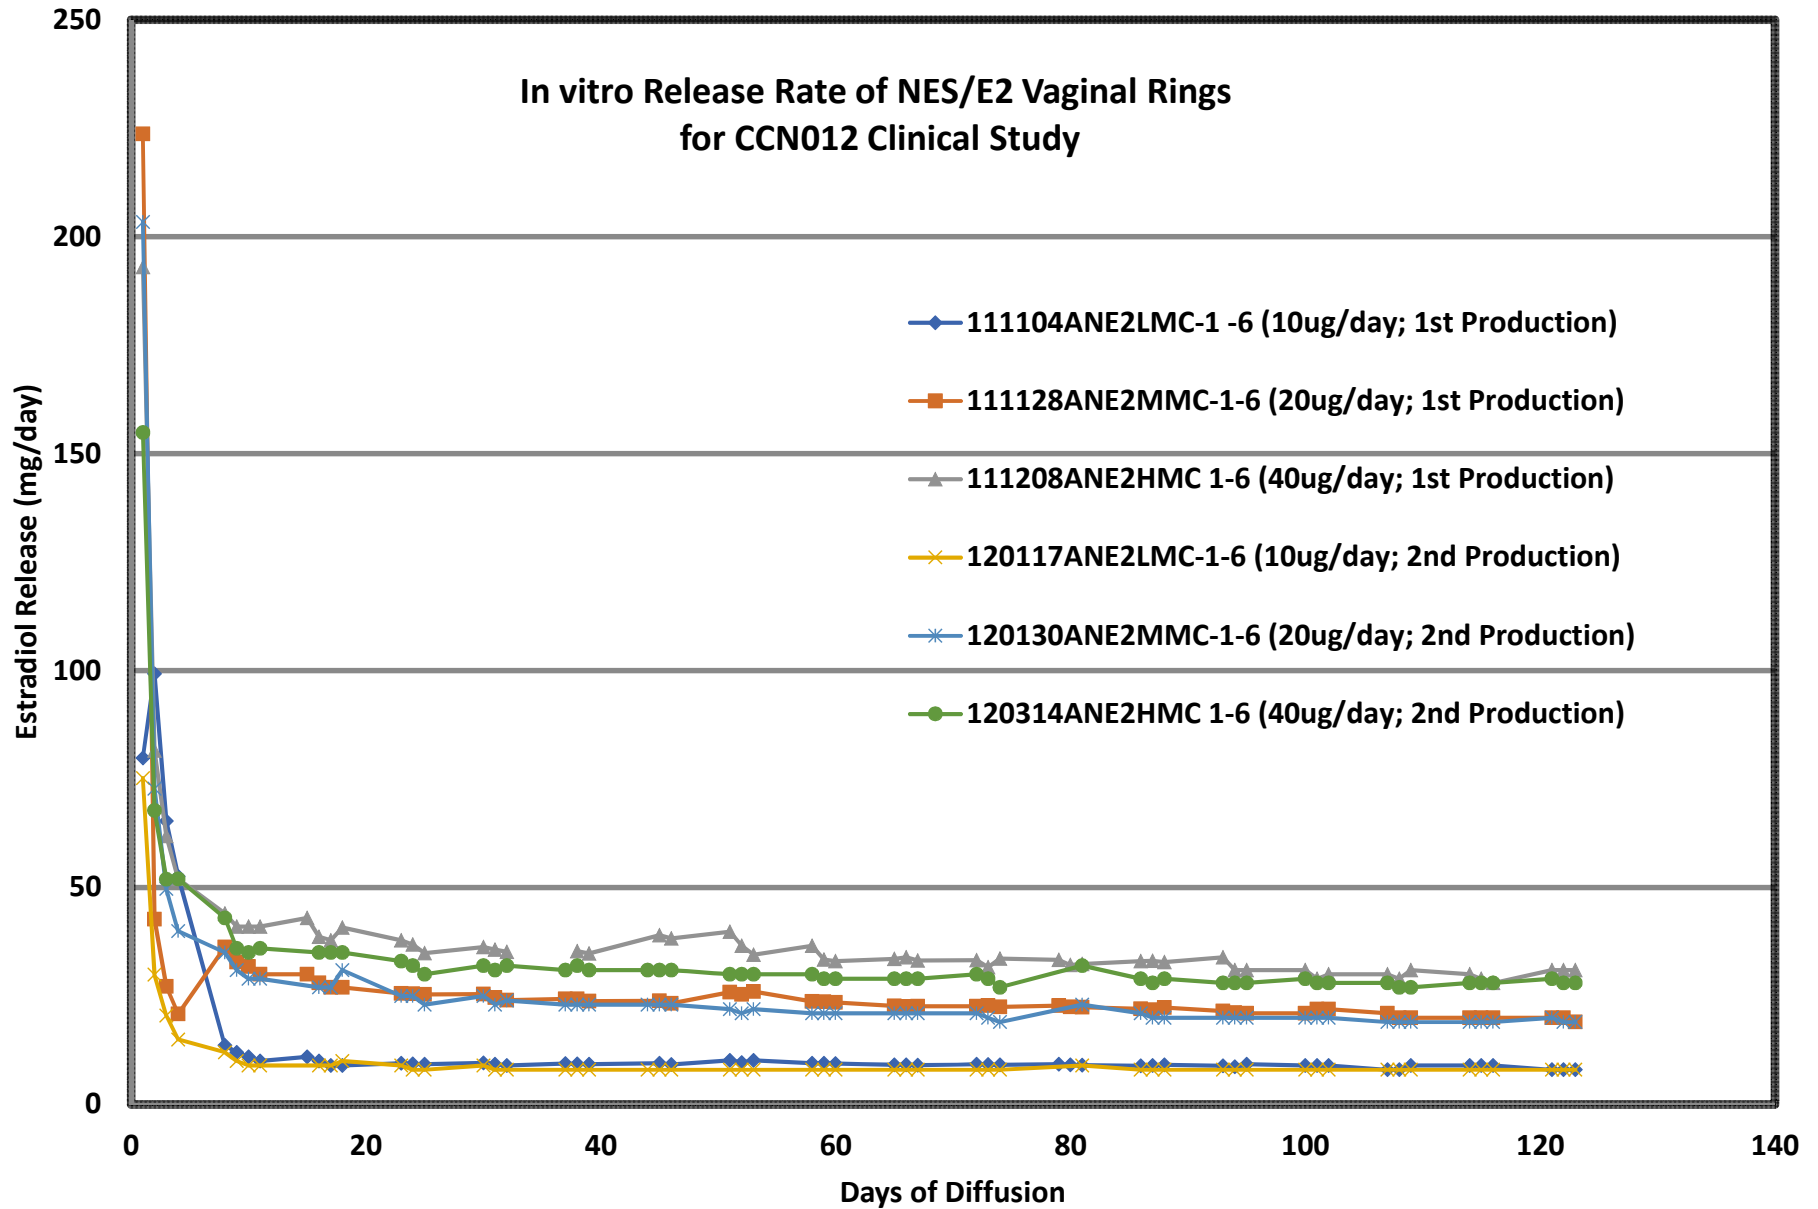

Supplement: NIHMS939011-supplement-1.pdf [file NIHMS939011-supplement-1.pdf]
